# Supplementary material for: Photostability and long-term preservation of a colloidal semiconductor-based single photon emitter in polymeric photonic structures
Source: Royal Society of Chemistry journal article supplement (doi:10.1039/c9na00411d), 2019-01-01
Supplement: c9na00411d1.pdf [file c9na00411d1.pdf]

## SUPPORTING INFORMATION

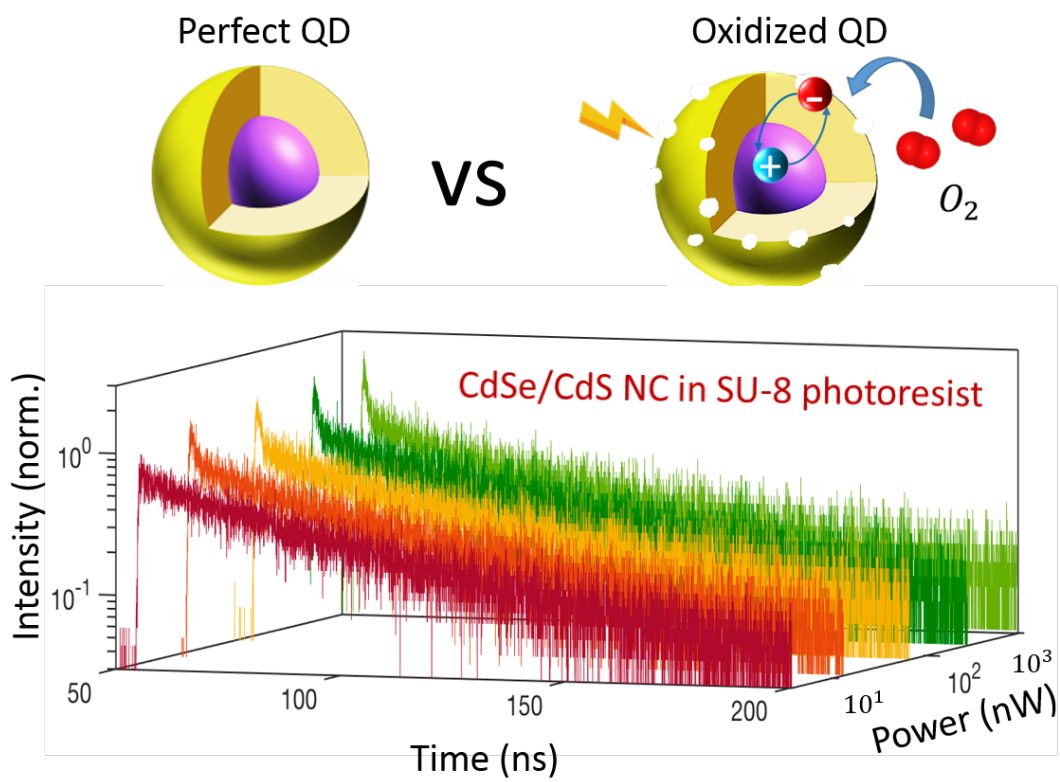

Figure prepared for TOC.

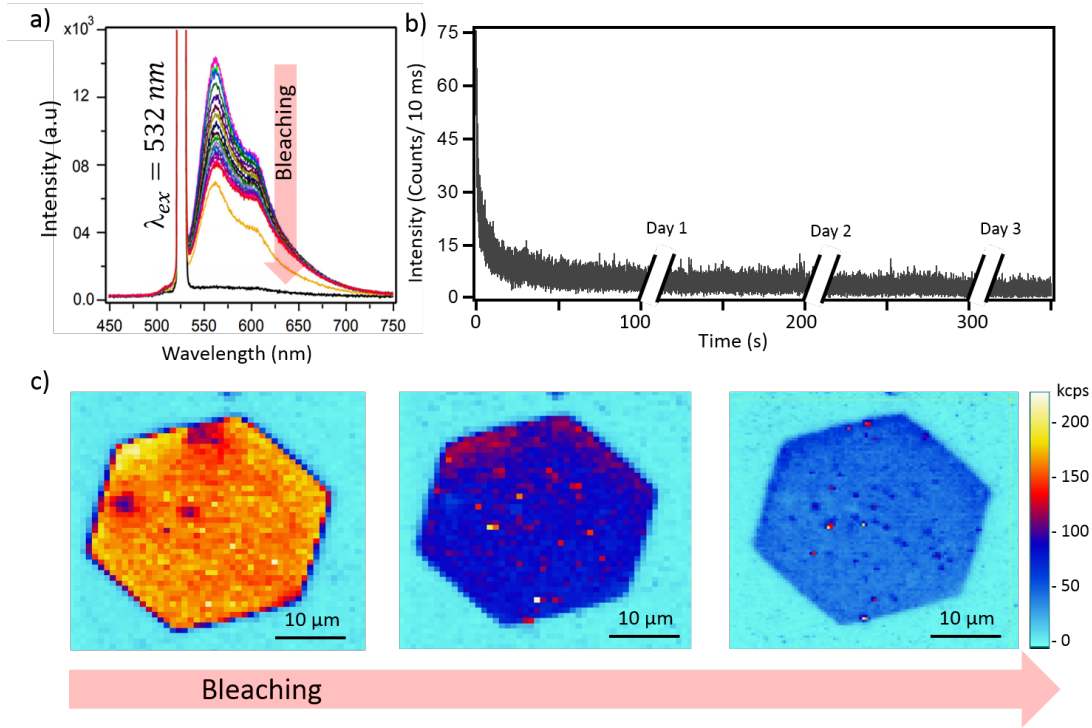

**FIGURE S 1** Bleaching the SU-8 fluorescence by a 532 nm laser excitation. (a) Fluorescence spectra intensities of SU-8 resist decrease as a function of the excitation time (by few second). (b) Measurement of fluorescence intensity of SU-8 resist as a function of time. Each measurement is realized by 100 s, day after day. (c) Evolution of fluorescence image of a SU-8 hexagonal disk containing quantum dots. At beginning, the fluorescence of SU-8 resist is very bright, and no QDs can be found. After scanning with high laser power, the fluorescence of SU-8 resist is strongly reduced and the QDs appear clearly.

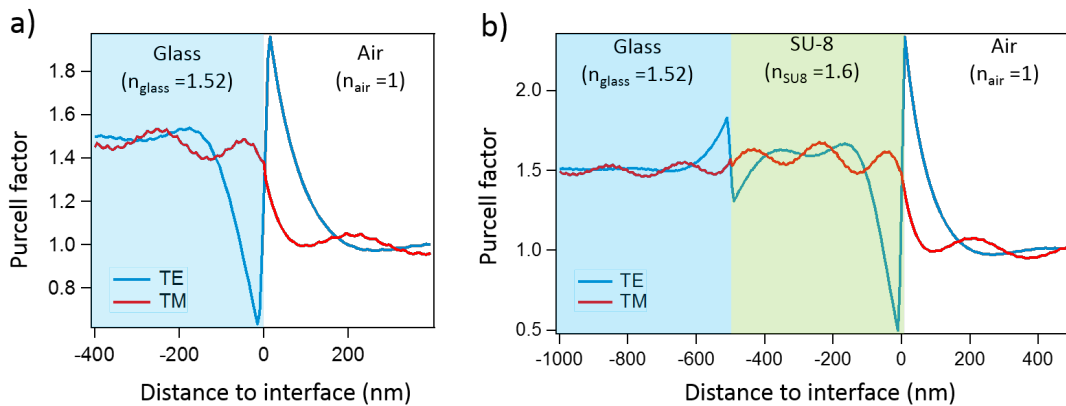

**FIGURE S 2** The calculation results of Purcell factor dependence upon the distance to the interface of different media. The single QD is considered as a single emitter locating at different distances for these simulations. The dependence of Purcell factor for single QD at the glass/air interface ( $n_{\text{glass}} = 1.51$ ,  $n_{\text{air}} = 1$ ) (a) and in the SU-8 polymer film ( $n_{\text{SU-8}} = 1.58$ ) (b).

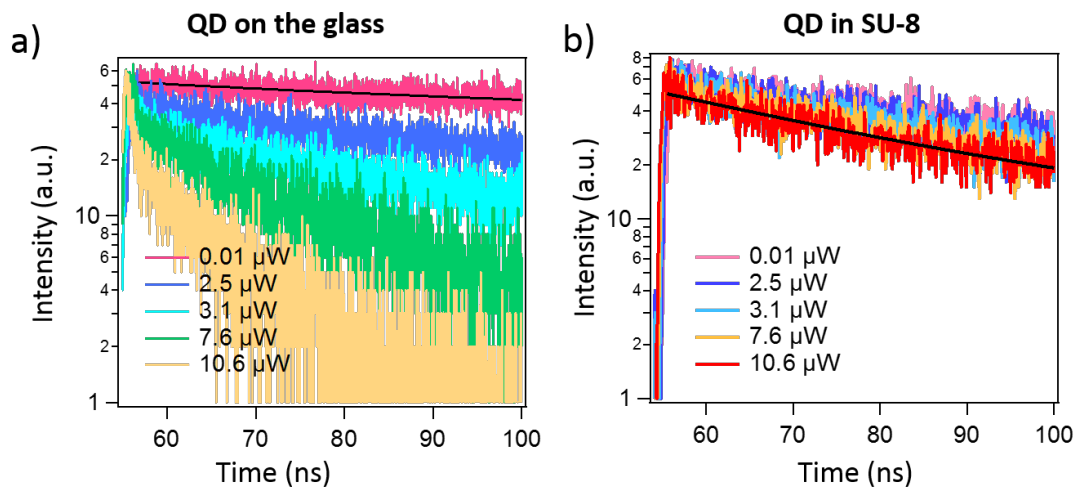

**FIGURE S 3** The measured PL lifetimes of single CdSe/CdS QDs excited at room temperature in different media. (a) The lifetime of a single QD excited on a glass substrate decreases from 70.32 to 46.21, 35.04, 24.67 and 15.75 ns at the different excited powers of 0.01, 2.5, 3.1, 7.6, and 10.6  $\mu\text{W}$ , respectively. (b) The lifetimes of a single QD located in SU-8 film is almost constant with a fitted lifetime of  $45.2 \pm 0.15$  ns.

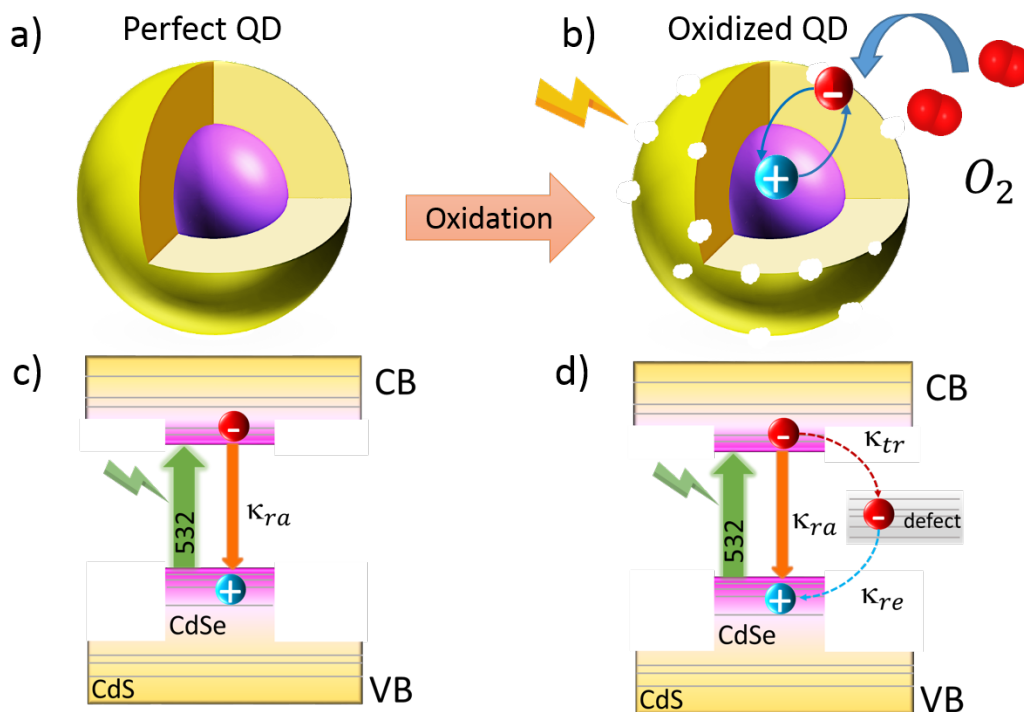

**FIGURE S 4** Illustration of a perfect (a) and an oxidized (b) CdSe/CdS core/shell structure. The schematic energy diagrams corresponding to the QD with (c) and without (d) defect mode on the shell.

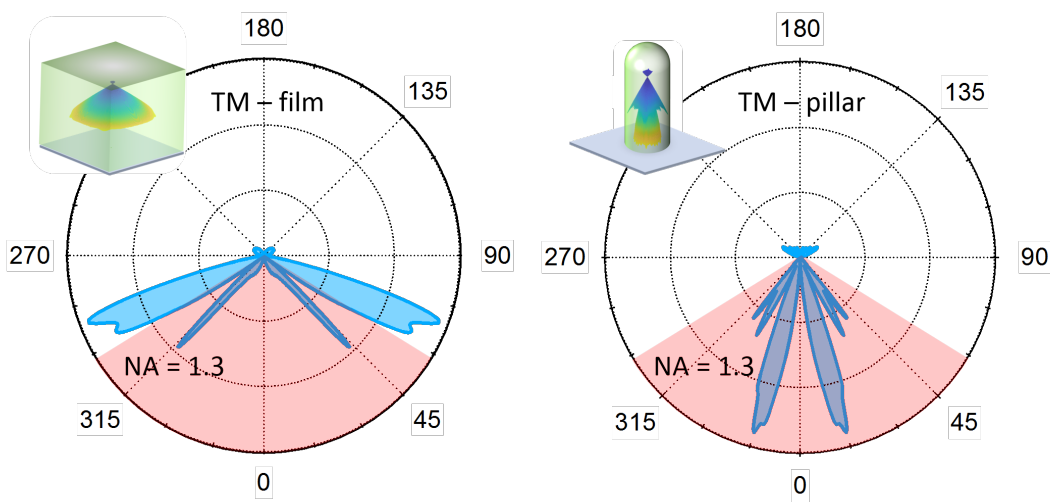

**FIGURE S 5** Simulated angular radiation pattern of a single QD in the film (a) and in the polymeric pillar (b). The QD is described by 2 orthogonal isotropic transition dipoles (2D dipoles) for the calculation. Theoretically, most emitted photons could be detected by the objective lens having a NA = 1.3, when the QD is embedded in a polymeric pillar.
